# Supplementary material for: Involvement of Essential Signaling Cascades and Analysis of Gene Networks in Diabesity
Source: PubMed Central journal article supplement (PMC7693799; doi:10.3390/genes11111256), 2020-10-25
Supplement: genes-11-01256-s001.pdf [file genes-11-01256-s001.pdf]

## Supplementary materials

**Supplementary Table 1.** The most significant obesity genes that are common between the different types of diabetes; T1D, T2D, and MODY.

| Genes          | Genes            | Genes           | Genes           |
|----------------|------------------|-----------------|-----------------|
| <i>VDR</i>     | <i>BDNF</i>      | <i>PPARGC1A</i> | <i>SERPINC1</i> |
| <i>ACE</i>     | <i>IFNG</i>      | <i>SERPINE1</i> | <i>APOA1</i>    |
| <i>HMGCR</i>   | <i>ABCA1</i>     | <i>CYP19A1</i>  | <i>CCK</i>      |
| <i>MMP2</i>    | <i>RETN</i>      | <i>VCAM1</i>    | <i>ADRB2</i>    |
| <i>EDN1</i>    | <i>IL4</i>       | <i>TP53</i>     | <i>GAPDH</i>    |
| <i>ABCB7</i>   | <i>BCHE</i>      | <i>TNF</i>      | <i>APC</i>      |
| <i>GSR</i>     | <i>BCL2</i>      | <i>INSR</i>     | <i>TLR2</i>     |
| <i>FASLG</i>   | <i>TNFRSF11B</i> | <i>IFNA1</i>    | <i>VEGFA</i>    |
| <i>GGT1</i>    | <i>CD36</i>      | <i>HNF1B</i>    | <i>CDKN2A</i>   |
| <i>CYBA</i>    | <i>FGF2</i>      | <i>GNRH1</i>    | <i>TGFB1</i>    |
| <i>IGF1</i>    | <i>CLU</i>       | <i>HLA-DRB1</i> | <i>KCNJ11</i>   |
| <i>CCL11</i>   | <i>PCK2</i>      | <i>IL1A</i>     | <i>TFRC</i>     |
| <i>PTEN</i>    | <i>HK2</i>       | <i>LDLR</i>     | <i>ABCC8</i>    |
| <i>HMOX1</i>   | <i>G6PD</i>      | <i>LPL</i>      | <i>GAST</i>     |
| <i>HNF1A</i>   | <i>TF</i>        | <i>CAT</i>      | <i>TSHR</i>     |
| <i>NOS2</i>    | <i>GCK</i>       | <i>MPO</i>      | <i>JUN</i>      |
| <i>INS</i>     | <i>IGF1R</i>     | <i>TCF7L2</i>   | <i>HCRT</i>     |
| <i>FLT1</i>    | <i>IRS1</i>      | <i>LIPC</i>     | <i>SERPINF2</i> |
| <i>SLC6A4</i>  | <i>GHRL</i>      | <i>SELP</i>     | <i>TIMP1</i>    |
| <i>SOD2</i>    | <i>ICAM1</i>     | <i>GCG</i>      | <i>CSF2</i>     |
| <i>BGLAP</i>   | <i>RECK</i>      | <i>F5</i>       | <i>GHRH</i>     |
| <i>MMP3</i>    | <i>RPS27A</i>    | <i>IL8</i>      | <i>MMP9</i>     |
| <i>PPARA</i>   | <i>TNFRSF1B</i>  | <i>HLA-A</i>    | <i>CD14</i>     |
| <i>NGF</i>     | <i>APOB</i>      | <i>SLC2A2</i>   | <i>ADIPOQ</i>   |
| <i>GATA3</i>   | <i>CS</i>        | <i>AKT1</i>     |                 |
| <i>IL2RA</i>   | <i>LTF</i>       | <i>PIK3R1</i>   |                 |
| <i>PAX4</i>    | <i>IL5</i>       | <i>GRP</i>      |                 |
| <i>TTR</i>     | <i>AGT</i>       | <i>NR1H2</i>    |                 |
| <i>LEP</i>     | <i>CGA</i>       | <i>TNFRSF1A</i> |                 |
| <i>PTPRN2</i>  | <i>PPARG</i>     | <i>STAT3</i>    |                 |
| <i>OXT</i>     | <i>HNF4A</i>     | <i>SPP1</i>     |                 |
| <i>CYP1A2</i>  | <i>CRP</i>       | <i>F2</i>       |                 |
| <i>TG</i>      | <i>HIF1A</i>     | <i>PTGS2</i>    |                 |
| <i>CYP2C19</i> | <i>CALCA</i>     | <i>AHSG</i>     |                 |
| <i>NOS1</i>    | <i>SERPINA1</i>  | <i>B2M</i>      |                 |
| <i>CRH</i>     | <i>NOS3</i>      | <i>LRP5</i>     |                 |
| <i>IL10</i>    | <i>MAPT</i>      | <i>OLR1</i>     |                 |
| <i>PRL</i>     | <i>GLP1R</i>     | <i>GH1</i>      |                 |
| <i>IGF2</i>    | <i>CASR</i>      | <i>ITGB3</i>    |                 |
| <i>LAPP</i>    | <i>CNR1</i>      | <i>CYP2C9</i>   |                 |

|                |                |               |  |
|----------------|----------------|---------------|--|
| <i>MTHFR</i>   | <i>DKK1</i>    | <i>IL1B</i>   |  |
| <i>ISL1</i>    | <i>NFE2L2</i>  | <i>REN</i>    |  |
| <i>PAX6</i>    | <i>NR3C1</i>   | <i>VWF</i>    |  |
| <i>TNFSF11</i> | <i>HP</i>      | <i>NPY</i>    |  |
| <i>GHR</i>     | <i>OPRM1</i>   | <i>IL18</i>   |  |
| <i>DPP4</i>    | <i>CYP17A1</i> | <i>GAD2</i>   |  |
| <i>NPPB</i>    | <i>TLR4</i>    | <i>IGFBP2</i> |  |
| <i>APOC3</i>   | <i>LEPR</i>    | <i>AR</i>     |  |
| <i>SOD1</i>    | <i>BMP6</i>    | <i>GAD1</i>   |  |
| <i>IFNA2</i>   | <i>NPPA</i>    | <i>PCSK9</i>  |  |
| <i>CD79A</i>   | <i>ESR1</i>    | <i>EPO</i>    |  |
| <i>FOXM1</i>   | <i>SST</i>     | <i>ACHE</i>   |  |
| <i>PIK3CA</i>  | <i>PRF1</i>    | <i>CP</i>     |  |
| <i>APOE</i>    | <i>BMP4</i>    | <i>KLK3</i>   |  |
| <i>IL2</i>     | <i>NEUROD1</i> | <i>IL1R1</i>  |  |
| <i>FAS</i>     | <i>SPARC</i>   | <i>CCL2</i>   |  |
| <i>C3</i>      | <i>AGTR1</i>   | <i>HGF</i>    |  |
| <i>PDX1</i>    | <i>IGFBP3</i>  | <i>IL6</i>    |  |
| <i>PON1</i>    | <i>ALB</i>     | <i>APP</i>    |  |
| <i>NEUROG3</i> | <i>PTGS1</i>   | <i>CPT2</i>   |  |
| <i>FOXA2</i>   | <i>LCAT</i>    | <i>COMT</i>   |  |
| <i>IGFBP1</i>  | <i>APOA4</i>   | <i>UCP2</i>   |  |
| <i>HSPD1</i>   | <i>POMC</i>    | <i>PROC</i>   |  |

**Supplementary Table 2.** Involved GO terms from ClueGo enrichment analysis for cluster 1 genes.

| GO ID                | GO Term                                                                | Group p-Value Corrected with Bonferroni step down | % Associated Genes | Nr. Genes | Associated Genes Found                                                                                                                                                                                                                                                                                                              |
|----------------------|------------------------------------------------------------------------|---------------------------------------------------|--------------------|-----------|-------------------------------------------------------------------------------------------------------------------------------------------------------------------------------------------------------------------------------------------------------------------------------------------------------------------------------------|
| <b>R-HSA:375276</b>  | Peptide ligand-binding receptors                                       | 7.15293E-47                                       | 18.42              | 35.00     | [ <i>AGT, AGTR1, APLN, APLNR, APP, BDKRB2, C3, CCK, CCKAR, CCL5, CCR2, CCR5, CX3CR1, CXCL5, CXCL8, CXCR4, EDN1, EDNRA, F2, GAL, GHSR, GRP, HCRT, KNG1, MLN, NPY, NTS, OPRM1, OXT, POMC, PPY, PYY, SST, TAC1, TRH</i> ]                                                                                                              |
| <b>R-HSA:373076</b>  | Class A/1 (Rhodopsin-like receptors)                                   | 7.15293E-47                                       | 14.81              | 48.00     | [ <i>ADORA1, ADRA2A, ADRA2B, AGT, AGTR1, APLN, APLNR, APP, BDKRB2, C3, CCK, CCKAR, CCL5, CCR2, CCR5, CNR1, CNR2, CX3CR1, CXCL5, CXCL8, CXCR4, DRD2, DRD4, EDN1, EDNRA, F2, GAL, GHSR, GNRH1, GPR39, GRP, HCRT, HTR1A, HTR2A, KNG1, MLN, MTNR1A, MTNR1B, NPY, NTS, OPRM1, OXT, POMC, PPY, PYY, SST, TAC1, TRH</i> ]                  |
| <b>KEGG:04080</b>    | Neuroactive ligand-receptor interaction                                | 7.15293E-47                                       | 12.13              | 41.00     | [ <i>ADORA1, ADRA2A, ADRA2B, AGT, AGTR1, APLN, APLNR, BDKRB2, C3, CCK, CCKAR, CNR1, CNR2, DRD2, DRD4, EDN1, EDNRA, F2, GAL, GCG, GCGR, GHSR, GNRH1, GRP, HCRT, HTR1A, HTR2A, KNG1, MLN, MTNR1A, MTNR1B, NPY, NTS, OPRM1, OXT, POMC, PPY, PYY, SST, TAC1, TRH</i> ]                                                                  |
| <b>R-HSA:500792</b>  | GPCR ligand binding                                                    | 7.15293E-47                                       | 11.16              | 51.00     | [ <i>ADORA1, ADRA2A, ADRA2B, AGT, AGTR1, APLN, APLNR, APP, BDKRB2, C3, CASR, CCK, CCKAR, CCL5, CCR2, CCR5, CNR1, CNR2, CX3CR1, CXCL5, CXCL8, CXCR4, DRD2, DRD4, EDN1, EDNRA, F2, GAL, GCG, GCGR, GHSR, GNRH1, GPR39, GRP, HCRT, HTR1A, HTR2A, KNG1, MLN, MTNR1A, MTNR1B, NPY, NTS, OPRM1, OXT, POMC, PPY, PYY, SST, TAC1, TRH</i> ] |
| <b>R-HSA:418594</b>  | G alpha (i) signalling events                                          | 7.15293E-47                                       | 9.09               | 37.00     | [ <i>ADORA1, ADRA2A, ADRA2B, AGT, APLN, APLNR, APOA1, APOA2, APOB, APOE, APP, BDKRB2, C3, CASR, CCL5, CCR2, CCR5, CNR1, CNR2, CX3CR1, CXCL5, CXCL8, CXCR4, DRD2, DRD4, GAL, GNAI1, HTR1A, KNG1, MTNR1A, MTNR1B, NPY, OPRM1, POMC, PPY, PYY, SST</i> ]                                                                               |
| <b>R-HSA:8957275</b> | Post-translational protein phosphorylation                             | 7.24486E-42                                       | 28.70              | 31.00     | [ <i>AHSG, ALB, APOA1, APOA2, APOA5, APOB, APOE, APP, BMP4, C3, CP, CSF1, CST3, F5, FGA, FGF23, IGFBP1, IGFBP3, IGFBP5, IGFBP7, IL6, KNG1, PCSK9, PNPLA2, PROC, SERPIN1, SERPINC1, SPP1, TF, TIMP1, TNC</i> ]                                                                                                                       |
| <b>R-HSA:381426</b>  | Regulation of Insulin-like Growth Factor (IGF) transport and uptake by | 7.24486E-42                                       | 25.60              | 32.00     | [ <i>AHSG, ALB, APOA1, APOA2, APOA5, APOB, APOE, APP, BMP4, C3, CP, CSF1, CST3, F2, F5, FGA, FGF23, IGFBP1, IGFBP3,</i>                                                                                                                                                                                                             |

|                     |                                                                                                          |             |       |       |                                                                                                                                                                            |
|---------------------|----------------------------------------------------------------------------------------------------------|-------------|-------|-------|----------------------------------------------------------------------------------------------------------------------------------------------------------------------------|
|                     | Insulin-like Growth Factor Binding Proteins (IGFBPs)                                                     |             |       |       | <i>IGFBP5, IGFBP7, IL6, KNG1, PCSK9, PNPLA2, PROC, SERPINA1, SERPINC1, SPP1, TF, TIMP1, TNC]</i>                                                                           |
| <b>R-HSA:416476</b> | G alpha (q) signalling events                                                                            | 6.88134E-26 | 12.44 | 27.00 | <i>[AGT, AGTR1, APP, BDKRB2, CASR, CCK, CCKAR, EDN1, EDNRA, F2, GAST, GCG, GCGR, GHSR, GNRH1, GPR39, GRP, HCRT, HTR2A, KNG1, MLN, NTS, OXT, PIK3CA, PIK3R1, TAC1, TRH]</i> |
| <b>R-HSA:392023</b> | Adrenaline signalling through Alpha-2 adrenergic receptor                                                | 6.72026E-10 | 66.67 | 2.00  | <i>[ADRA2A, ADRA2B]</i>                                                                                                                                                    |
| <b>R-HSA:390651</b> | Dopamine receptors                                                                                       | 6.72026E-10 | 40.00 | 2.00  | <i>[DRD2, DRD4]</i>                                                                                                                                                        |
| <b>R-HSA:140875</b> | Common Pathway of Fibrin Clot Formation                                                                  | 6.72026E-10 | 22.73 | 5.00  | <i>[F2, F5, FGA, PROC, SERPINC1]</i>                                                                                                                                       |
| <b>R-HSA:390696</b> | Adrenoceptors                                                                                            | 6.72026E-10 | 22.22 | 2.00  | <i>[ADRA2A, ADRA2B]</i>                                                                                                                                                    |
| <b>R-HSA:390666</b> | Serotonin receptors                                                                                      | 6.72026E-10 | 16.67 | 2.00  | <i>[HTR1A, HTR2A]</i>                                                                                                                                                      |
| <b>R-HSA:375280</b> | Amine ligand-binding receptors                                                                           | 6.72026E-10 | 14.29 | 6.00  | <i>[ADRA2A, ADRA2B, DRD2, DRD4, HTR1A, HTR2A]</i>                                                                                                                          |
| <b>R-HSA:76009</b>  | Platelet Aggregation (Plug Formation)                                                                    | 6.72026E-10 | 10.26 | 4.00  | <i>[ADRA2A, ADRA2B, F2, FGA]</i>                                                                                                                                           |
| <b>R-HSA:140875</b> | Common Pathway of Fibrin Clot Formation                                                                  | 1.1004E-08  | 22.73 | 5.00  | <i>[F2, F5, FGA, PROC, SERPINC1]</i>                                                                                                                                       |
| <b>R-HSA:159763</b> | Transport of gamma-carboxylated protein precursors from the endoplasmic reticulum to the Golgi apparatus | 1.1004E-08  | 22.22 | 2.00  | <i>[F2, PROC]</i>                                                                                                                                                          |
| <b>R-HSA:159740</b> | Gamma-carboxylation of protein precursors                                                                | 1.1004E-08  | 20.00 | 2.00  | <i>[F2, PROC]</i>                                                                                                                                                          |
| <b>R-HSA:159782</b> | Removal of aminoterminal propeptides from gamma-carboxylated proteins                                    | 1.1004E-08  | 20.00 | 2.00  | <i>[F2, PROC]</i>                                                                                                                                                          |
| <b>R-HSA:140837</b> | Intrinsic Pathway of Fibrin Clot Formation                                                               | 1.1004E-08  | 18.18 | 4.00  | <i>[F2, KNG1, PROC, SERPINC1]</i>                                                                                                                                          |
| <b>R-HSA:159854</b> | Gamma-carboxylation, transport, and aminoterminal cleavage of proteins                                   | 1.1004E-08  | 18.18 | 2.00  | <i>[F2, PROC]</i>                                                                                                                                                          |

|                      |                                             |             |       |      |                                                             |
|----------------------|---------------------------------------------|-------------|-------|------|-------------------------------------------------------------|
| <b>R-HSA:140877</b>  | Formation of Fibrin Clot (Clotting Cascade) | 1.1004E-08  | 15.38 | 6.00 | [F2, F5, FGA, KNG1, PROC, SERPINC1]                         |
| <b>KEGG:04610</b>    | Complement and coagulation cascades         | 1.1004E-08  | 11.39 | 9.00 | [BDKRB2, C3, F2, F5, FGA, KNG1, PROC, SERPINA1, SERPINC1]   |
| <b>R-HSA:76009</b>   | Platelet Aggregation (Plug Formation)       | 1.1004E-08  | 10.26 | 4.00 | [ADRA2A, ADRA2B, F2, FGA]                                   |
| <b>R-HSA:173107</b>  | Binding and entry of HIV virion             | 2.31219E-08 | 20.00 | 2.00 | [CCR5, CXCR4]                                               |
| <b>R-HSA:6783783</b> | Interleukin-10 signaling                    | 2.31219E-08 | 14.89 | 7.00 | [CCL5, CCR2, CCR5, CSF1, CXCL8, IL6, TIMP1]                 |
| <b>R-HSA:380108</b>  | Chemokine receptors bind chemokines         | 2.31219E-08 | 14.58 | 7.00 | [CCL5, CCR2, CCR5, CX3CR1, CXCL5, CXCL8, CXCR4]             |
| <b>R-HSA:162594</b>  | Early Phase of HIV Life Cycle               | 2.31219E-08 | 10.00 | 2.00 | [CCR5, CXCR4]                                               |
| <b>KEGG:05142</b>    | Chagas disease (American trypanosomiasis)   | 3.50978E-07 | 8.74  | 9.00 | [BDKRB2, C3, CCL5, CXCL8, GNAI1, IL6, KNG1, PIK3CA, PIK3R1] |
| <b>KEGG:04614</b>    | Renin-angiotensin system                    | 0.000272724 | 8.70  | 2.00 | [AGT, AGTR1]                                                |
| <b>KEGG:04924</b>    | Renin secretion                             | 0.000272724 | 8.70  | 6.00 | [ADORA1, AGT, AGTR1, EDN1, EDNRA, GNAI1]                    |
| <b>R-HSA:8963901</b> | Chylomicron remodeling                      | 0.000437865 | 55.56 | 5.00 | [APOA1, APOA2, APOA5, APOB, APOE]                           |
| <b>R-HSA:8963888</b> | Chylomicron assembly                        | 0.000437865 | 44.44 | 4.00 | [APOA1, APOA2, APOB, APOE]                                  |
| <b>R-HSA:8964026</b> | Chylomicron clearance                       | 0.000437865 | 40.00 | 2.00 | [APOB, APOE]                                                |
| <b>R-HSA:3000471</b> | Scavenging by Class B Receptors             | 0.000437865 | 33.33 | 2.00 | [APOA1, APOB]                                               |
| <b>R-HSA:8964058</b> | HDL remodeling                              | 0.000437865 | 30.00 | 3.00 | [ALB, APOA1, APOE]                                          |
| <b>R-HSA:8963898</b> | Plasma lipoprotein assembly                 | 0.000437865 | 22.22 | 4.00 | [APOA1, APOA2, APOB, APOE]                                  |
| <b>R-HSA:8963899</b> | Plasma lipoprotein remodeling               | 0.000437865 | 20.00 | 6.00 | [ALB, APOA1, APOA2, APOA5, APOB, APOE]                      |
| <b>R-HSA:3000480</b> | Scavenging by Class A Receptors             | 0.000437865 | 15.79 | 3.00 | [APOA1, APOB, APOE]                                         |
| <b>R-HSA:2168880</b> | Scavenging of heme from plasma              | 0.000437865 | 15.38 | 2.00 | [ALB, APOA1]                                                |
| <b>R-HSA:8964043</b> | Plasma lipoprotein clearance                | 0.000437865 | 12.12 | 4.00 | [APOA1, APOB, APOE, PCSK9]                                  |
| <b>R-HSA:5686938</b> | Regulation of TLR by endogenous ligand      | 0.000437865 | 10.53 | 2.00 | [APOB, FGA]                                                 |

|                      |                                                           |             |       |      |                                                      |
|----------------------|-----------------------------------------------------------|-------------|-------|------|------------------------------------------------------|
| <b>R-HSA:8964038</b> | LDL clearance                                             | 0.000437865 | 10.53 | 2.00 | <i>[APOB, PCSK9]</i>                                 |
| <b>R-HSA:174824</b>  | Plasma lipoprotein assembly, remodeling, and clearance    | 0.000437865 | 10.14 | 7.00 | <i>[ALB, APOA1, APOA2, APOA5, APOB, APOE, PCSK9]</i> |
| <b>KEGG:04979</b>    | Cholesterol metabolism                                    | 0.000437865 | 10.00 | 5.00 | <i>[APOA1, APOA2, APOB, APOE, PCSK9]</i>             |
| <b>R-HSA:2173782</b> | Binding and Uptake of Ligands by Scavenger Receptors      | 0.000437865 | 9.52  | 4.00 | <i>[ALB, APOA1, APOB, APOE]</i>                      |
| <b>R-HSA:975634</b>  | Retinoid metabolism and transport                         | 0.000437865 | 9.30  | 4.00 | <i>[APOA1, APOA2, APOB, APOE]</i>                    |
| <b>R-HSA:6806667</b> | Metabolism of fat-soluble vitamins                        | 0.000437865 | 8.51  | 4.00 | <i>[APOA1, APOA2, APOB, APOE]</i>                    |
| <b>KEGG:04977</b>    | Vitamin digestion and absorption                          | 0.000437865 | 8.33  | 2.00 | <i>[APOA1, APOB]</i>                                 |
| <b>R-HSA:8851907</b> | MET activates PI3K/AKT signaling                          | 0.004786962 | 33.33 | 2.00 | <i>[PIK3CA, PIK3R1]</i>                              |
| <b>R-HSA:9603381</b> | Activated NTRK3 signals through PI3K                      | 0.004786962 | 33.33 | 2.00 | <i>[PIK3CA, PIK3R1]</i>                              |
| <b>R-HSA:9028335</b> | Activated NTRK2 signals through PI3K                      | 0.004786962 | 28.57 | 2.00 | <i>[PIK3CA, PIK3R1]</i>                              |
| <b>R-HSA:198203</b>  | PI3K/AKT activation                                       | 0.004786962 | 22.22 | 2.00 | <i>[PIK3CA, PIK3R1]</i>                              |
| <b>R-HSA:1250342</b> | PI3K events in ERBB4 signaling                            | 0.004786962 | 20.00 | 2.00 | <i>[PIK3CA, PIK3R1]</i>                              |
| <b>R-HSA:8853334</b> | Signaling by FGFR3 fusions in cancer                      | 0.004786962 | 20.00 | 2.00 | <i>[PIK3CA, PIK3R1]</i>                              |
| <b>R-HSA:5655291</b> | Signaling by FGFR4 in disease                             | 0.004786962 | 18.18 | 2.00 | <i>[PIK3CA, PIK3R1]</i>                              |
| <b>R-HSA:5654710</b> | PI-3K cascade:FGFR3                                       | 0.004786962 | 16.67 | 3.00 | <i>[FGF23, PIK3CA, PIK3R1]</i>                       |
| <b>R-HSA:9027276</b> | Erythropoietin activates Phosphoinositide-3-kinase (PI3K) | 0.004786962 | 16.67 | 2.00 | <i>[PIK3CA, PIK3R1]</i>                              |
| <b>R-HSA:5654720</b> | PI-3K cascade:FGFR4                                       | 0.004786962 | 15.00 | 3.00 | <i>[FGF23, PIK3CA, PIK3R1]</i>                       |
| <b>R-HSA:5654689</b> | PI-3K cascade:FGFR1                                       | 0.004786962 | 14.29 | 3.00 | <i>[FGF23, PIK3CA, PIK3R1]</i>                       |
| <b>R-HSA:5655332</b> | Signaling by FGFR3 in disease                             | 0.004786962 | 13.64 | 3.00 | <i>[FGF23, PIK3CA, PIK3R1]</i>                       |

|                      |                                                                  |             |       |      |                                                     |
|----------------------|------------------------------------------------------------------|-------------|-------|------|-----------------------------------------------------|
| <b>R-HSA:8853338</b> | Signaling by FGFR3 point mutants in cancer                       | 0.004786962 | 13.64 | 3.00 | <i>[FGF23, PIK3CA, PIK3R1]</i>                      |
| <b>R-HSA:5637810</b> | Constitutive Signaling by EGFRvIII                               | 0.004786962 | 13.33 | 2.00 | <i>[PIK3CA, PIK3R1]</i>                             |
| <b>R-HSA:5637812</b> | Signaling by EGFRvIII in Cancer                                  | 0.004786962 | 13.33 | 2.00 | <i>[PIK3CA, PIK3R1]</i>                             |
| <b>R-HSA:5654695</b> | PI-3K cascade:FGFR2                                              | 0.004786962 | 13.04 | 3.00 | <i>[FGF23, PIK3CA, PIK3R1]</i>                      |
| <b>R-HSA:1963642</b> | PI3K events in ERBB2 signaling                                   | 0.004786962 | 12.50 | 2.00 | <i>[PIK3CA, PIK3R1]</i>                             |
| <b>R-HSA:2730905</b> | Role of LAT2/NTAL/LAB on calcium mobilization                    | 0.004786962 | 12.50 | 2.00 | <i>[PIK3CA, PIK3R1]</i>                             |
| <b>R-HSA:5654708</b> | Downstream signaling of activated FGFR3                          | 0.004786962 | 12.00 | 3.00 | <i>[FGF23, PIK3CA, PIK3R1]</i>                      |
| <b>R-HSA:180292</b>  | GAB1 signalosome                                                 | 0.004786962 | 11.76 | 2.00 | <i>[PIK3CA, PIK3R1]</i>                             |
| <b>R-HSA:9034015</b> | Signaling by NTRK3 (TRKC)                                        | 0.004786962 | 11.76 | 2.00 | <i>[PIK3CA, PIK3R1]</i>                             |
| <b>R-HSA:1839117</b> | Signaling by cytosolic FGFR1 fusion mutants                      | 0.004786962 | 11.11 | 2.00 | <i>[PIK3CA, PIK3R1]</i>                             |
| <b>R-HSA:210993</b>  | Tie2 Signaling                                                   | 0.004786962 | 11.11 | 2.00 | <i>[PIK3CA, PIK3R1]</i>                             |
| <b>R-HSA:5654716</b> | Downstream signaling of activated FGFR4                          | 0.004786962 | 11.11 | 3.00 | <i>[FGF23, PIK3CA, PIK3R1]</i>                      |
| <b>KEGG:04923</b>    | Regulation of lipolysis in adipocytes                            | 0.004786962 | 10.91 | 6.00 | <i>[ADORA1, GNAI1, NPY, PIK3CA, PIK3R1, PNPLA2]</i> |
| <b>R-HSA:1236382</b> | Constitutive Signaling by Ligand-Responsive EGFR Cancer Variants | 0.004786962 | 10.53 | 2.00 | <i>[PIK3CA, PIK3R1]</i>                             |
| <b>R-HSA:5637815</b> | Signaling by Ligand-Responsive EGFR Variants in Cancer           | 0.004786962 | 10.53 | 2.00 | <i>[PIK3CA, PIK3R1]</i>                             |
| <b>R-HSA:5654696</b> | Downstream signaling of activated FGFR2                          | 0.004786962 | 10.00 | 3.00 | <i>[FGF23, PIK3CA, PIK3R1]</i>                      |
| <b>R-HSA:1839124</b> | FGFR1 mutant receptor activation                                 | 0.004786962 | 9.68  | 3.00 | <i>[FGF23, PIK3CA, PIK3R1]</i>                      |
| <b>R-HSA:5654687</b> | Downstream signaling of activated FGFR1                          | 0.004786962 | 9.68  | 3.00 | <i>[FGF23, PIK3CA, PIK3R1]</i>                      |
| <b>R-HSA:389357</b>  | CD28 dependent PI3K/Akt signaling                                | 0.004786962 | 9.09  | 2.00 | <i>[PIK3CA, PIK3R1]</i>                             |

|                      |                                                                               |             |       |      |                             |
|----------------------|-------------------------------------------------------------------------------|-------------|-------|------|-----------------------------|
| <b>R-HSA:912631</b>  | Regulation of signaling by CBL                                                | 0.004786962 | 9.09  | 2.00 | <i>[PIK3CA, PIK3R1]</i>     |
| <b>R-HSA:373753</b>  | Nephrin family interactions                                                   | 0.004786962 | 8.70  | 2.00 | <i>[PIK3CA, PIK3R1]</i>     |
| <b>R-HSA:1643713</b> | Signaling by EGFR in Cancer                                                   | 0.004786962 | 8.00  | 2.00 | <i>[PIK3CA, PIK3R1]</i>     |
| <b>R-HSA:2029485</b> | Role of phospholipids in phagocytosis                                         | 0.004786962 | 8.00  | 2.00 | <i>[PIK3CA, PIK3R1]</i>     |
| <b>R-HSA:9006115</b> | Signaling by NTRK2 (TRKB)                                                     | 0.004786962 | 8.00  | 2.00 | <i>[PIK3CA, PIK3R1]</i>     |
| <b>R-HSA:9006335</b> | Signaling by Erythropoietin                                                   | 0.004786962 | 8.00  | 2.00 | <i>[PIK3CA, PIK3R1]</i>     |
| <b>R-HSA:9615017</b> | FOXO-mediated transcription of oxidative stress, metabolic and neuronal genes | 0.005339022 | 10.34 | 3.00 | <i>[IGFBP1, NPY, POMC]</i>  |
| <b>R-HSA:202040</b>  | G-protein activation                                                          | 0.005773145 | 10.71 | 3.00 | <i>[GNAI1, OPRM1, POMC]</i> |
| <b>KEGG:05143</b>    | African trypanosomiasis                                                       | 0.006542366 | 8.11  | 3.00 | <i>[APOA1, IL6, KNG1]</i>   |
| <b>R-HSA:380994</b>  | ATF4 activates genes                                                          | 0.013149546 | 8.00  | 2.00 | <i>[CXCL8, IGFBP1]</i>      |
| <b>R-HSA:381771</b>  | Synthesis, secretion, and inactivation of Glucagon-like Peptide-1 (GLP-1)     | 0.022380594 | 10.00 | 2.00 | <i>[GCG, GRP]</i>           |
| <b>R-HSA:400508</b>  | Incretin synthesis, secretion, and inactivation                               | 0.022380594 | 8.70  | 2.00 | <i>[GCG, GRP]</i>           |

**Supplementary Table 3.** Involved GO terms from ClueGo enrichment analysis for cluster 2 genes.

| <b>GO ID</b>        | <b>GO Term</b>         | <b>Term p-Value Corrected with Bonferroni step down</b> | <b>% Associated Genes</b> | <b>Nr. Genes</b> | <b>Associated Genes Found</b>                                                                              |
|---------------------|------------------------|---------------------------------------------------------|---------------------------|------------------|------------------------------------------------------------------------------------------------------------|
| <b>R-HSA:114608</b> | Platelet degranulation | 3.48546E-20                                             | 11.63                     | 15.00            | <i>[A2M, CLU, F13A1, FGB, HGF, IGF1, IGF2, PROS1, SERPINE1, SERPINF2, SPARC, TGFB1, THBS1, VEGFA, VWF]</i> |



|                      |                                                                                   |             |       |       |                                                                                                              |
|----------------------|-----------------------------------------------------------------------------------|-------------|-------|-------|--------------------------------------------------------------------------------------------------------------|
| <b>R-HSA:76005</b>   | Response to elevated platelet cytosolic Ca <sup>2+</sup>                          | 5.87143E-20 | 11.19 | 15.00 | [ <i>A2M, CLU, F13A1, FGB, HGF, IGF1, IGF2, PROS1, SERPINE1, SERPINF2, SPARC, TGFB1, THBS1, VEGFA, VWF</i> ] |
| <b>R-HSA:373080</b>  | Class B/2 (Secretin family receptors)                                             | 9.2479E-13  | 10.53 | 10.00 | [ <i>ADM, CALCA, CRH, GHRH, GIP, GLP1R, GNAS, LAPP, PTH, RAMP1</i> ]                                         |
| <b>KEGG:04610</b>    | Complement and coagulation cascades                                               | 4.78905E-10 | 10.13 | 8.00  | [ <i>A2M, CLU, F13A1, FGB, PROS1, SERPINE1, SERPINF2, VWF</i> ]                                              |
| <b>KEGG:04923</b>    | Regulation of lipolysis in adipocytes                                             | 9.30048E-08 | 10.91 | 6.00  | [ <i>ADRB1, ADRB2, ADRB3, CGA, GNAS, TSHR</i> ]                                                              |
| <b>R-HSA:419812</b>  | Calcitonin-like ligand receptors                                                  | 1.06302E-07 | 40.00 | 4.00  | [ <i>ADM, CALCA, LAPP, RAMP1</i> ]                                                                           |
| <b>R-HSA:140877</b>  | Formation of Fibrin Clot (Clotting Cascade)                                       | 6.20737E-07 | 12.82 | 5.00  | [ <i>A2M, F13A1, FGB, PROS1, VWF</i> ]                                                                       |
| <b>R-HSA:390696</b>  | Adrenoceptors                                                                     | 1.26179E-05 | 33.33 | 3.00  | [ <i>ADRB1, ADRB2, ADRB3</i> ]                                                                               |
| <b>R-HSA:420092</b>  | Glucagon-type ligand receptors                                                    | 1.31787E-05 | 12.12 | 4.00  | [ <i>GHRH, GIP, GLP1R, GNAS</i> ]                                                                            |
| <b>R-HSA:140875</b>  | Common Pathway of Fibrin Clot Formation                                           | 0.000161063 | 13.64 | 3.00  | [ <i>F13A1, FGB, PROS1</i> ]                                                                                 |
| <b>R-HSA:8866910</b> | TFAP2 (AP-2) family regulates transcription of growth factors and their receptors | 0.00082292  | 13.33 | 2.00  | [ <i>CGA, VEGFA</i> ]                                                                                        |
| <b>R-HSA:354194</b>  | GRB2:SOS provides linkage to MAPK signaling for Integrins                         | 0.00082292  | 13.33 | 2.00  | [ <i>FGB, VWF</i> ]                                                                                          |
| <b>R-HSA:372708</b>  | p130Cas linkage to MAPK signaling for integrins                                   | 0.00082292  | 13.33 | 2.00  | [ <i>FGB, VWF</i> ]                                                                                          |
| <b>R-HSA:2428933</b> | SHC-related events triggered by IGF1R                                             | 0.001140851 | 22.22 | 2.00  | [ <i>IGF1, IGF2</i> ]                                                                                        |
| <b>R-HSA:75205</b>   | Dissolution of Fibrin Clot                                                        | 0.001227039 | 15.38 | 2.00  | [ <i>SERPINE1, SERPINF2</i> ]                                                                                |
| <b>R-HSA:375281</b>  | Hormone ligand-binding receptors                                                  | 0.001560206 | 16.67 | 2.00  | [ <i>CGA, TSHR</i> ]                                                                                         |

**Supplementary Table 4.** Involved GO terms from ClueGo enrichment analysis for cluster 3 genes.

| GO ID              | GO Term            | Term p-Value Corrected with Bonferroni step down | % Associated Genes | Nr. Genes | Associated Genes Found           |
|--------------------|--------------------|--------------------------------------------------|--------------------|-----------|----------------------------------|
| <b>R-HSA:74749</b> | Signal attenuation | 1.00541E-07                                      | 40.00              | 4.00      | [ <i>INS, INSR, IRS1, SHC1</i> ] |
| <b>R-HSA:74749</b> | Signal attenuation | 1.00541E-07                                      | 40.00              | 4.00      | [ <i>INS, INSR, IRS1, SHC1</i> ] |

|                      |                                                                   |             |       |      |                                                        |
|----------------------|-------------------------------------------------------------------|-------------|-------|------|--------------------------------------------------------|
| <b>KEGG:04910</b>    | Insulin signaling pathway                                         | 2.53779E-07 | 5.11  | 7.00 | [ <i>INPPL1, INS, INSR, IRS1, PRKCZ, PTPN1, SHC1</i> ] |
| <b>R-HSA:8856825</b> | Cargo recognition for clathrin-mediated endocytosis               | 1.85804E-06 | 5.66  | 6.00 | [ <i>IGF2R, LDLR, RPS27A, SH3GL2, TFRC, WNT5A</i> ]    |
| <b>R-HSA:74713</b>   | IRS activation                                                    | 2.49046E-06 | 60.00 | 3.00 | [ <i>INS, INSR, IRS1</i> ]                             |
| <b>R-HSA:432722</b>  | Golgi Associated Vesicle Biogenesis                               | 2.59797E-06 | 8.93  | 5.00 | [ <i>FTH1, IGF2R, PIK3C2A, SH3GL2, TFRC</i> ]          |
| <b>R-HSA:199992</b>  | trans-Golgi Network Vesicle Budding                               | 9.03152E-06 | 6.94  | 5.00 | [ <i>FTH1, IGF2R, PIK3C2A, SH3GL2, TFRC</i> ]          |
| <b>R-HSA:421837</b>  | Clathrin derived vesicle budding                                  | 9.03152E-06 | 6.94  | 5.00 | [ <i>FTH1, IGF2R, PIK3C2A, SH3GL2, TFRC</i> ]          |
| <b>KEGG:04930</b>    | Type II diabetes mellitus                                         | 6.23421E-05 | 8.70  | 4.00 | [ <i>INS, INSR, IRS1, PRKCZ</i> ]                      |
| <b>R-HSA:512988</b>  | Interleukin-3, Interleukin-5 and GM-CSF signaling                 | 7.17434E-05 | 8.33  | 4.00 | [ <i>IL5, INPPL1, RPS27A, SHC1</i> ]                   |
| <b>KEGG:04913</b>    | Ovarian steroidogenesis                                           | 7.54143E-05 | 8.16  | 4.00 | [ <i>IGF1R, INS, INSR, LDLR</i> ]                      |
| <b>R-HSA:74751</b>   | Insulin receptor signalling cascade                               | 0.00010795  | 7.41  | 4.00 | [ <i>INS, INSR, IRS1, SHC1</i> ]                       |
| <b>R-HSA:74751</b>   | Insulin receptor signalling cascade                               | 0.00010795  | 7.41  | 4.00 | [ <i>INS, INSR, IRS1, SHC1</i> ]                       |
| <b>KEGG:04213</b>    | Longevity regulating pathway                                      | 0.000181635 | 6.45  | 4.00 | [ <i>IGF1R, INS, INSR, IRS1</i> ]                      |
| <b>R-HSA:6807004</b> | Negative regulation of MET activity                               | 0.00024795  | 14.29 | 3.00 | [ <i>PTPN1, RPS27A, SH3GL2</i> ]                       |
| <b>R-HSA:74752</b>   | Signaling by Insulin receptor                                     | 0.000420816 | 5.13  | 4.00 | [ <i>INS, INSR, IRS1, SHC1</i> ]                       |
| <b>R-HSA:74752</b>   | Signaling by Insulin receptor                                     | 0.000420816 | 5.13  | 4.00 | [ <i>INS, INSR, IRS1, SHC1</i> ]                       |
| <b>R-HSA:6806834</b> | Signaling by MET                                                  | 0.000424953 | 5.06  | 4.00 | [ <i>PTPN1, RPS27A, SH3GL2, SHC1</i> ]                 |
| <b>R-HSA:912526</b>  | Interleukin receptor SHC signaling                                | 0.000478543 | 11.11 | 3.00 | [ <i>IL5, INPPL1, SHC1</i> ]                           |
| <b>R-HSA:1592389</b> | Activation of Matrix Metalloproteinases                           | 0.000847019 | 9.09  | 3.00 | [ <i>MMP8, MMP9, TIMP2</i> ]                           |
| <b>KEGG:04960</b>    | Aldosterone-regulated sodium reabsorption                         | 0.001145307 | 8.11  | 3.00 | [ <i>INS, INSR, IRS1</i> ]                             |
| <b>R-HSA:451927</b>  | Interleukin-2 family signaling                                    | 0.001841966 | 6.82  | 3.00 | [ <i>IL5, INPPL1, SHC1</i> ]                           |
| <b>R-HSA:177929</b>  | Signaling by EGFR                                                 | 0.002418122 | 6.12  | 3.00 | [ <i>RPS27A, SH3GL2, SHC1</i> ]                        |
| <b>R-HSA:2428933</b> | SHC-related events triggered by IGF1R                             | 0.002535729 | 22.22 | 2.00 | [ <i>IGF1R, SHC1</i> ]                                 |
| <b>R-HSA:2428933</b> | SHC-related events triggered by IGF1R                             | 0.002535729 | 22.22 | 2.00 | [ <i>IGF1R, SHC1</i> ]                                 |
| <b>KEGG:04923</b>    | Regulation of lipolysis in adipocytes                             | 0.002696766 | 5.45  | 3.00 | [ <i>INS, INSR, IRS1</i> ]                             |
| <b>R-HSA:2404192</b> | Signaling by Type 1 Insulin-like Growth Factor 1 Receptor (IGF1R) | 0.002723271 | 5.56  | 3.00 | [ <i>IGF1R, IRS1, SHC1</i> ]                           |

|                      |                                                                           |             |       |      |                             |
|----------------------|---------------------------------------------------------------------------|-------------|-------|------|-----------------------------|
| <b>R-HSA:2404192</b> | Signaling by Type 1 Insulin-like Growth Factor 1 Receptor (IGF1R)         | 0.002723271 | 5.56  | 3.00 | <i>[IGF1R, IRS1, SHC1]</i>  |
| <b>R-HSA:2428924</b> | IGF1R signaling cascade                                                   | 0.002736368 | 5.66  | 3.00 | <i>[IGF1R, IRS1, SHC1]</i>  |
| <b>R-HSA:2428924</b> | IGF1R signaling cascade                                                   | 0.002736368 | 5.66  | 3.00 | <i>[IGF1R, IRS1, SHC1]</i>  |
| <b>R-HSA:1236977</b> | Endosomal/Vacuolar pathway                                                | 0.002790979 | 18.18 | 2.00 | <i>[B2M, CTSS]</i>          |
| <b>KEGG:04216</b>    | Ferroptosis                                                               | 0.002937287 | 5.00  | 2.00 | <i>[FTH1, TFRC]</i>         |
| <b>R-HSA:5654741</b> | Signaling by FGFR3                                                        | 0.002937287 | 5.00  | 2.00 | <i>[RPS27A, SHC1]</i>       |
| <b>R-HSA:917937</b>  | Iron uptake and transport                                                 | 0.002948518 | 5.17  | 3.00 | <i>[FTH1, RPS27A, TFRC]</i> |
| <b>R-HSA:182971</b>  | EGFR downregulation                                                       | 0.005312053 | 6.45  | 2.00 | <i>[RPS27A, SH3GL2]</i>     |
| <b>R-HSA:2173791</b> | TGF-beta receptor signaling in EMT (epithelial to mesenchymal transition) | 0.005586252 | 12.50 | 2.00 | <i>[PRKCZ, RPS27A]</i>      |
| <b>R-HSA:8875360</b> | InlB-mediated entry of Listeria monocytogenes into host cell              | 0.005586252 | 12.50 | 2.00 | <i>[RPS27A, SH3GL2]</i>     |
| <b>R-HSA:76009</b>   | Platelet Aggregation (Plug Formation)                                     | 0.005587752 | 5.13  | 2.00 | <i>[PTPN1, SHC1]</i>        |
| <b>R-HSA:9034015</b> | Signaling by NTRK3 (TRKC)                                                 | 0.005796306 | 11.76 | 2.00 | <i>[IRS1, SHC1]</i>         |
| <b>R-HSA:9034015</b> | Signaling by NTRK3 (TRKC)                                                 | 0.005796306 | 11.76 | 2.00 | <i>[IRS1, SHC1]</i>         |
| <b>R-HSA:1236382</b> | Constitutive Signaling by Ligand-Responsive EGFR Cancer Variants          | 0.006609053 | 10.53 | 2.00 | <i>[RPS27A, SHC1]</i>       |
| <b>R-HSA:5637815</b> | Signaling by Ligand-Responsive EGFR Variants in Cancer                    | 0.006609053 | 10.53 | 2.00 | <i>[RPS27A, SHC1]</i>       |
| <b>R-HSA:2424491</b> | DAP12 signaling                                                           | 0.006633994 | 6.67  | 2.00 | <i>[B2M, SHC1]</i>          |
| <b>R-HSA:354192</b>  | Integrin alphaIIb beta3 signaling                                         | 0.006716084 | 7.41  | 2.00 | <i>[PTPN1, SHC1]</i>        |
| <b>R-HSA:9006921</b> | Integrin signaling                                                        | 0.006716084 | 7.41  | 2.00 | <i>[PTPN1, SHC1]</i>        |
| <b>R-HSA:77387</b>   | Insulin receptor recycling                                                | 0.007471563 | 7.69  | 2.00 | <i>[INS, INSR]</i>          |
| <b>R-HSA:8876384</b> | Listeria monocytogenes entry into host cells                              | 0.008005403 | 9.09  | 2.00 | <i>[RPS27A, SH3GL2]</i>     |
| <b>R-HSA:1643713</b> | Signaling by EGFR in Cancer                                               | 0.008056271 | 8.00  | 2.00 | <i>[RPS27A, SHC1]</i>       |
| <b>R-HSA:982772</b>  | Growth hormone receptor signaling                                         | 0.008481092 | 8.33  | 2.00 | <i>[IRS1, PTPN1]</i>        |
